# Supplementary material
Source: HighWire-hosted journal article supplement (https://bmjopen.bmj.com/content/13/7/e071613)
Supplement: inline-supplementary-material-1 [file inline-supplementary-material-1.pdf]

1     **Figure S1. Study time course**

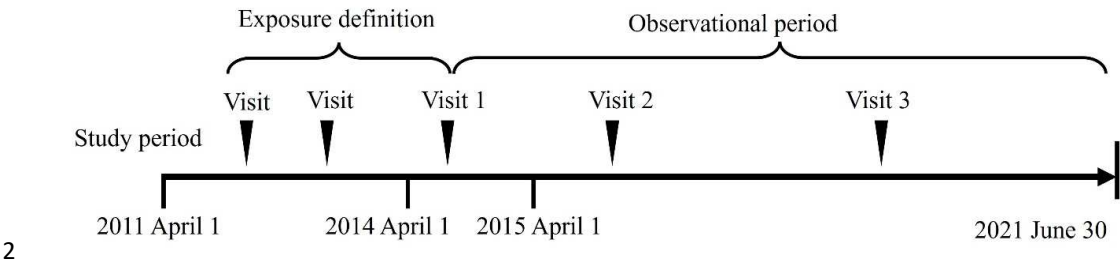

3     Visit 1 represents the first visit for health screening after April 1, 2014.

4

5     **Table S1. Demographic and clinical characteristics of the included and excluded**  
6     **participants**

| Demographic and clinical characteristics                         | Included<br>participants | Excluded<br>participants |
|------------------------------------------------------------------|--------------------------|--------------------------|
| N                                                                | 88,744                   | 91,096                   |
| Age, year                                                        | 51.6±7.9                 | 53.6±8.8                 |
| Female, no. (%)                                                  | 25,341 (28.6%)           | 35,151 (38.6%)           |
| Body mass index, kg/m <sup>2</sup>                               | 23.7±3.6                 | 23.6±3.7                 |
| Estimated glomerular filtration rate, mL/min/1.73 m <sup>2</sup> | 78.4±13.9                | 76.8±14.7                |
| Baseline proteinuria, no. (%)                                    |                          |                          |
| -                                                                | 77,729 (87.9%)           | 79,132 (87.1%)           |
| ±                                                                | 7,024 (7.9%)             | 8,041 (8.8%)             |
| 1+                                                               | 2,616 (3.0%)             | 2,653 (2.9%)             |
| 2+                                                               | 864 (1.0%)               | 807 (0.9%)               |
| 3+                                                               | 246 (0.3%)               | 220 (0.2%)               |
| Systolic blood pressure, mmHg                                    | 124±17                   | 124.6±17.7               |
| diastolic blood pressure, mmHg                                   | 77±12                    | 76.7±12.1                |
| Hemoglobin A1c, %                                                | 5.6±0.7                  | 5.7±0.7                  |
| LDL cholesterol, mg/dL                                           | 128±32.1                 | 125.5±32.2               |
| Use of antihypertensive drugs, no. (%)                           | 14,232 (16.1%)           | 16,930 (18.6%)           |
| Use of antidiabetic drugs, no. (%)                               | 4,368 (4.9%)             | 5,053 (5.6%)             |
| Use of antihyperlipidemic drugs, no. (%)                         | 8,612 (9.7%)             | 10,379 (11.4%)           |
| Current smoking, no. (%)                                         | 24,680 (27.8%)           | 24,453 (26.9%)           |
| History of stroke, no. (%)                                       | 1,085 (1.3%)             | 1,185 (1.5%)             |
| History of cardiovascular disease, no. (%)                       | 1,996 (2.3%)             | 2,242 (2.8%)             |

7     Variables are presented as mean ± standard deviation or n (%).

8 **Table S2. Demographic and clinical characteristics of the participants by drop-out**

| Demographic and clinical characteristics                         | Drop-out (-)   | Drop-out (+)   |
|------------------------------------------------------------------|----------------|----------------|
| N                                                                | 64,222         | 24,522         |
| Age, year                                                        | 49.3±6.6       | 57.8±7.8       |
| Female, no.(%)                                                   | 17,455 (27.1%) | 7,886 (32.2%)  |
| Body mass index, kg/m <sup>2</sup>                               | 23.8±3.7       | 23.6±3.5       |
| Estimated glomerular filtration rate, mL/min/1.73 m <sup>2</sup> | 79.5±13.5      | 75.7±14.3      |
| Baseline proteinuria, no. (%)                                    |                |                |
| -                                                                | 56,259 (87.9%) | 21,470 (87.8%) |
| ±                                                                | 5,185 (8.1%)   | 1,839 (7.5%)   |
| 1+                                                               | 1,847 (2.9%)   | 769 (3.1%)     |
| 2+                                                               | 571 (0.9%)     | 293 (1.2%)     |
| 3+                                                               | 150 (0.2%)     | 96 (0.4%)      |
| Systolic blood pressure, mmHg                                    | 123.4±16.3     | 126.9±17.8     |
| Diastolic blood pressure, mmHg                                   | 76.9±12.1      | 77.6±11.8      |
| Hemoglobin A1c, %                                                | 5.7±0.7        | 5.6±0.8        |
| LDL cholesterol, mg/dL                                           | 128.3±32.1     | 128.2±32.2     |
| Use of antihypertensive drugs, no. (%)                           | 8,158 (12.7%)  | 6,074 (24.8%)  |
| Use of antidiabetic drugs, no. (%)                               | 2,421 (3.8%)   | 1,947 (7.9%)   |
| Use of antihyperlipidemic drugs, no. (%)                         | 4,996 (7.8%)   | 3,616 (14.8%)  |
| Current smoking, no. (%)                                         | 18,463 (28.8%) | 6,217 (25.4%)  |
| History of stroke, no. (%)                                       | 591 (0.9%)     | 494 (2.1%)     |
| History of cardiovascular disease, no. (%)                       | 1,093 (1.8%)   | 903 (3.7%)     |

9 \*Variables are presented as mean ± standard deviation or n (%).

10    **Table S3. Hazard ratios for MACE among patients without major risk factors**  
11    **(hypertension, diabetes, hyperlipidaemia, and smoking) for CVD**

| Group                  | HR (95% CI)      |
|------------------------|------------------|
| All-negative           | Reference        |
| Once-positive          | 2.15 (1.15–4.01) |
| Repetitively-positives | 2.81 (1.20–6.56) |

12    \*Adjusted for age, sex, and eGFR, HbA1c, BMI, SBP, LDL cholesterol, antihypertensive  
13    drugs, antidiabetic drugs, antihyperlipidemic drugs, history of myocardial infarction, and  
14    history of stroke, smoking, and alcohol intake.

15

16    **Table S4. Number of participants with missing variables**

| Variable                          | Missing | Observed | Total  | Missing<br>proportion |
|-----------------------------------|---------|----------|--------|-----------------------|
| Hemoglobin A1c                    | 433     | 88,311   | 88,744 | 0.49%                 |
| Body mass index                   | 2       | 88,742   | 88,744 | 0.00%                 |
| Systolic blood pressure           | 6       | 88,738   | 88,744 | 0.01%                 |
| LDL cholesterol                   | 9       | 88,735   | 88,744 | 0.01%                 |
| Use of antihypertensive drugs     | 100     | 88,644   | 88,744 | 0.11%                 |
| Use of antidiabetic drugs         | 100     | 88,644   | 88,744 | 0.11%                 |
| Use of antihyperlipidemic drugs   | 100     | 88,644   | 88,744 | 0.11%                 |
| History of stroke                 | 2,283   | 86,461   | 88,744 | 2.57%                 |
| History of cardiovascular disease | 2,284   | 86,460   | 88,744 | 2.57%                 |
| Current smoking status            | 112     | 88,632   | 88,744 | 0.13%                 |
| Alcohol consumption               | 1,262   | 87,482   | 88,744 | 1.42%                 |

17

18 **Table S5. Demographic and clinical characteristics of participants who had missing data**

|                                                                  |             | N             |
|------------------------------------------------------------------|-------------|---------------|
| Age, year                                                        | 51.2±7.9    | 2,634         |
| Female, no. (%)                                                  | 406 (15.4%) | 2,634         |
| Body mass index, kg/m <sup>2</sup>                               | 24.2±3.6    | 2,632         |
| Estimated glomerular filtration rate, mL/min/1.73 m <sup>2</sup> | 77.8±14.1   | 2,634         |
| Baseline proteinuria, no. (%)                                    |             | 2,625         |
|                                                                  | -           | 2,189 (83.4%) |
|                                                                  | ±           | 324 (12.3%)   |
|                                                                  | 1+          | 84 (3.2%)     |
|                                                                  | 2+          | 23 (0.9%)     |
|                                                                  | 3+          | 5 (0.2%)      |
| Systolic blood pressure, mmHg                                    | 122±16      | 2,628         |
| diastolic blood pressure, mmHg                                   | 77±12       | 2,628         |
| Hemoglobin A1c, %                                                | 5.6±0.7     | 2,201         |
| LDL cholesterol, mg/dL                                           | 124±31      | 2,625         |
| Use of antihypertensive drugs, no. (%)                           | 455 (18.0%) | 2,534         |
| Use of antidiabetic drugs, no. (%)                               | 136 (5.4%)  | 2,534         |

|                                             |             |       |
|---------------------------------------------|-------------|-------|
| Use of antihyperlipidemic drugs, no. (%)    | 277 (10.9%) | 2,534 |
| Current smoking, no. (%)                    | 747 (29.6%) | 2,522 |
| History of stroke, no. (%)                  | 7 (2.0%)    | 351   |
| History of cardio vascular disease, no. (%) | 14 (4.0%)   | 350   |

\*Variables are presented as the mean ± standard deviation or n (%).

21     **Table S6. Hazard ratios for MACE in the survival analyses**

| Urine test results      | HR (95% CI)      |
|-------------------------|------------------|
| All negative            | Reference        |
| Single positive         | 1.46 (1.14–1.87) |
| Two positives           | 2.25 (1.59–3.19) |
| Three or more positives | 2.12 (1.60–2.82) |

22     \*Adjusted for age, sex, and eGFR, HbA1c, BMI, SBP, LDL cholesterol, antihypertensive  
23     drugs, antidiabetic drugs, antihyperlipidemic drugs, history of myocardial infarction, and  
24     history of stroke, smoking, and alcohol intake.

25
